# Supplementary material for: Factors affecting the preparation of ordered mesoporous ZrO2 using the replica method
Source: Royal Society of Chemistry journal article supplement (doi:10.1039/b807620k), 2008-01-01
Supplement: b807620k.pdf [file b807620k.pdf]

## Electronic Supplementary Information

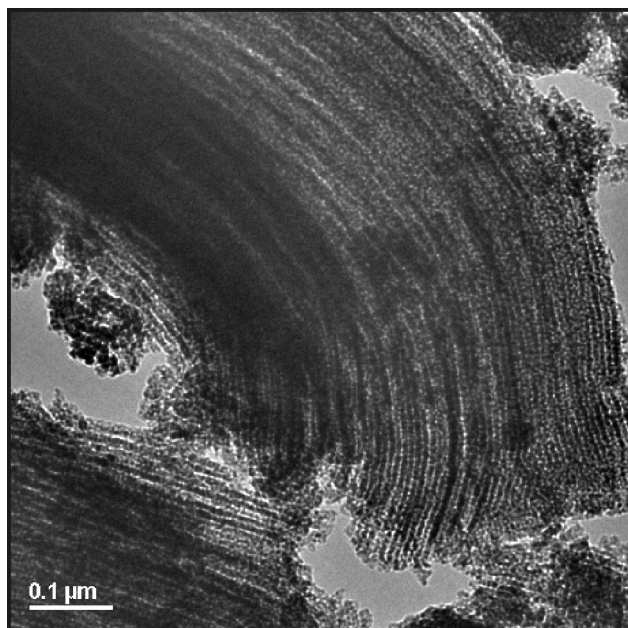

Figure ESI 1. Low magnification TEM image of ZrO<sub>2</sub>-SR

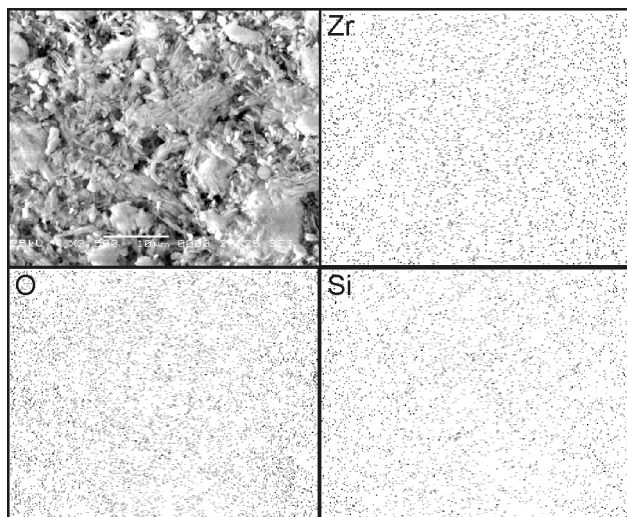

Figure ESI 2. SEM image of ZrO<sub>2</sub>-SR and corresponding elemental maps for O, Si and Zr. Note: because of the different detector geometries for imaging and EDS, this correspondence is not exact.
